# Computationally-informed insights into anhedonia and treatment by $\kappa$ -opioid receptor antagonism

Bilal A. Bari<sup>1,2</sup>, Andrew D. Krystal<sup>3,4</sup>, Diego A. Pizzagalli<sup>2\*</sup>, Samuel J. Gershman<sup>5,6\*</sup>

<sup>1</sup>Department of Psychiatry, Massachusetts General Hospital, Boston, MA, USA

<sup>2</sup>McLean Hospital, Harvard Medical School, Belmont, MA, USA

<sup>3</sup>Department of Psychiatry, University of California San Francisco, San Francisco, CA, USA

<sup>4</sup>Departments of Psychiatry and Behavioral Sciences and Radiology, Duke University School of Medicine, Durham, NC, USA

<sup>5</sup>Department of Psychology and Center for Brain Science, Harvard University, Cambridge, MA, USA

<sup>6</sup>Center for Brains, Minds, and Machines, Massachusetts Institute of Technology, Cambridge, MA, USA

\*Denotes co-senior authorship

Correspondence: Bilal A. Bari, [bbari@mgh.harvard.edu](mailto:bbari@mgh.harvard.edu)

## 1 Abstract

2 Anhedonia, the loss of pleasure, is prevalent and impairing. Parsing its computational basis  
3 promises to explain its transdiagnostic character. We argue that one manifestation of anhedonia—  
4 reward insensitivity—may be linked to limited memory capacity. Further, the need to economize  
5 on limited capacity engenders a perseverative bias towards frequently chosen actions. Anhedonia  
6 may also be linked with deviations from optimal perseveration for a given memory capacity, a  
7 pattern that causes *inefficiency* because it results in less reward for the same memory cost. To test  
8 these hypotheses, we perform secondary analysis of a randomized controlled trial testing  $\kappa$ -opioid  
9 receptor (KOR) antagonism for anhedonia, as well as analyses of three other datasets. We find  
10 that anhedonia is associated with deficits in efficiency but not memory, whereas KOR antagonism  
11 (which likely elevates tonic dopamine) increases memory and efficiency. KOR antagonism therefore  
12 has distinct cognitive effects, only one related to anhedonia.

## 13 Introduction

14 Anhedonia, the loss of pleasure or lack of reactivity to pleasurable stimuli, is observed in many  
15 psychiatric illnesses, including major depressive disorder, bipolar disorder, schizophrenia, anx-  
16 iety disorders, post-traumatic stress disorder, substance use disorders, autism, and attention-  
17 deficit/hyperactivity disorder [1, 2, 3, 4, 5, 6, 7, 8, 9]. The transdiagnostic character of anhedonia  
18 suggests a common mechanism across disorders. The most systematic attempts to formalize this  
19 common mechanism have utilized concepts from reinforcement learning [10]. Early models posited  
20 that anhedonia corresponds to a reduction in reward sensitivity [11, 12], but the predictions of  
21 these models have not been consistently validated, suggesting a more complex picture [13]. Here,  
22 we argue that one neglected source of complexity is the interplay between reward sensitivity and  
23 cognitive capacity limits.

24 In reinforcement learning theory, states (e.g., stimuli, context) are mapped to actions by a  
25 learned policy. The amount of memory needed to store a policy is dictated by the mutual infor-  
26 mation between states and actions; any physical system (such as the brain) has a limited memory  
27 capacity. One implication of limited capacity is reward insensitivity and, thus, some aspects of  
28 anhedonia may arise from cognitive resource limitations.

29 Under capacity limits, policies must be *compressed* by discarding some state information [14,  
30 15, 16]. This results in the tendency to reuse frequently chosen actions across multiple states—a  
31 form of *perseveration*, the tendency to repeat actions independently of their reinforcement history.  
32 The theory of policy compression is normative: it specifies an optimal level of perseveration for  
33 a given capacity limit. Empirically, compression strategies may differ, with some policies yielding  
34 more reward than others for the same cost. We refer to deviations from optimal perseveration  
35 as *inefficiency* because it results in a suboptimal use of finite memory (less reward for the same  
36 memory utilization). This phenotype is conceptually distinct from capacity, and can be measured  
37 separately. We argue here that capacity and efficiency may be key phenotypes for understanding  
38 cognitive disturbances in anhedonia. We show that these can be estimated from behavioral data  
39 on a widely used behavioral assay, the Probabilistic Reward Task (PRT), and that they reveal new  
40 aspects of anhedonia that would otherwise have been invisible.

41 We also address the underlying neural mechanisms and treatment implications. Our previous  
42 work suggested that tonic dopamine should determine the allocation of cognitive resources for  
43 task performance based on reward rate [17, 18]. Reduction in tonic dopamine should therefore  
44 produce insensitivity of task performance to reward rate [19]. It stands to reason that increasing  
45 tonic dopamine should increase reward sensitivity. We demonstrate that this is consistent with the  
46 effects of  $\kappa$  opioid receptor (KOR) antagonism, which elevates tonic dopamine [20, 21, 22, 23, 24].  
47 We find that efficiency also increases, suggesting that tonic dopamine may not only determine the  
48 amount of resources available but also the efficiency of their allocation. Mechanistically, this might  
49 be implemented through dopamine-dependent changes in learning rate for perseveration. Finally,  
50 we find that anhedonia is associated with changes in efficiency but not memory, highlighting the  
51 clinical utility of distinguishing these computational phenotypes.

## 52 Results

### 53 Policy complexity and efficiency in anhedonia after $\kappa$ -opioid receptor antagonism

54 We performed a secondary analysis of an 8-week, multicenter, placebo-controlled, double-blind,  
55 randomized trial to test the effects of KOR antagonism for anhedonia (Figure 1A) [25, 26]. Because  
56 this trial identified a significant treatment effect of KOR antagonism for anhedonia (as measured by  
57 the Snaith-Hamilton Pleasure Scale, SHAPS), we sought to understand the cognitive basis of this  
58 improvement. We analyzed a total of 55 participants (KOR antagonist group:  $N = 24$ ; placebo  
59 group:  $N = 31$ ) who completed both a baseline and post-treatment Probabilistic Reward Task  
60 (PRT). Owing to previously-reported baseline differences in anhedonia between the two groups

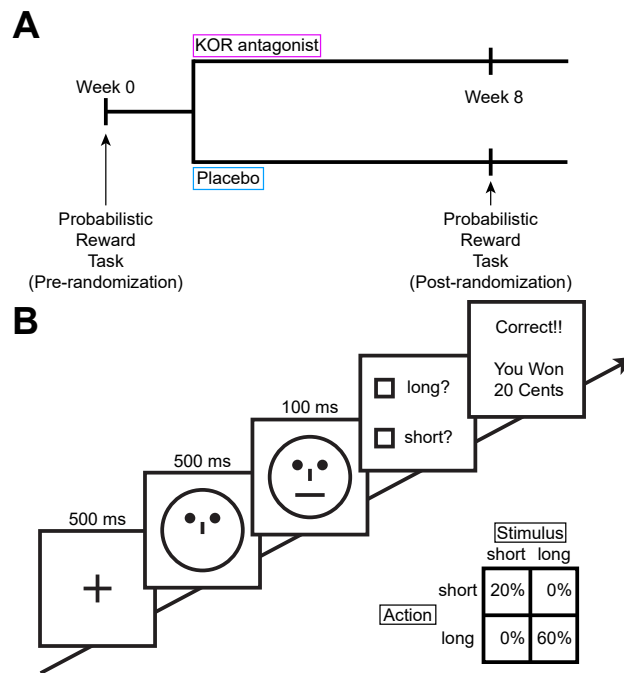

**Figure 1: Trial and task design.**

A) Participants were randomized to 8 weeks of placebo ( $N = 31$ ) or a KOR antagonist ( $N = 24$ ) and completed the PRT at baseline and at week 8.

B) On each trial of the PRT, participants fixated on a cross, followed by the presentation of a face without a mouth, followed by either a short (11.5mm) or long (13mm) mouth in the face. Participants responded by pressing one of two keyboard keys and completed 200 trials in two blocks of 100 trials. The bottom right shows an example reward schedule where the long stimulus is rewarded more often than the short stimulus. The mapping between response, stimulus, and reward was counterbalanced between participants.

61 (mean SHAPS  $\pm$  SD: placebo  $33.03 \pm 5.54$ ; KOR  $37.29 \pm 8.89$ ,  $p = 0.0338$ ), we analyzed the  
 62 pre-treatment groups separately.

63 The PRT is a reward-based decision making task that asks participants to discriminate two  
 64 similar stimuli (Figure 1B) [27, 28]. Unbeknownst to participants, one of the two stimuli yields  
 65 reward more often than the other when correctly identified. According to the theory of policy  
 66 compression [16], performance in this task (average reward) depends on the amount of information  
 67 participants encode about the underlying state (i.e., the stimulus identity), quantified by the mu-  
 68 tual information between states and actions—a participant’s *policy complexity*. Each participant is  
 69 assumed to have a capacity limit (upper bound on policy complexity), which delimits their achiev-  
 70 able performance. If participants maximally utilize their capacity, their average reward should  
 71 fall along an optimal reward-complexity frontier, as shown in Figure 2A,B. In the PRT, maximal  
 72 reward can be obtained at a policy complexity of 1 bit, corresponding to a policy that perfectly  
 73 discriminates the two stimuli. At the other extreme, a subject with no capacity will generate a  
 74 policy that ignores the stimuli entirely. Participant policies tend to lie close to the optimal frontier,  
 75 indicating that they are utilizing most of their capacity. At the low end of the policy complexity  
 76 range, participant policies fall off the optimal frontier (Figure 2F,G), indicating under-utilization  
 77 of resources (inefficiency)—a pattern also observed in previous studies [15, 29].

78 At 8 weeks, placebo treatment resulted in a decrease in both policy complexity and reward,  
 79 while KOR antagonism yielded an increase in both (Figure 2C). This resulted in significant between-  
 80 group differences for both policy complexity (Figure 2D; mean change in policy complexity (post-  
 81 treatment minus baseline)  $\pm$  SEM: placebo,  $-0.0245 \pm 0.0141$ ; KOR,  $0.0281 \pm 0.0211$ ,  $p = 0.0362$ )  
 82 and reward (Figure 2E; mean change in reward (post-treatment minus baseline)  $\pm$  SEM: placebo,

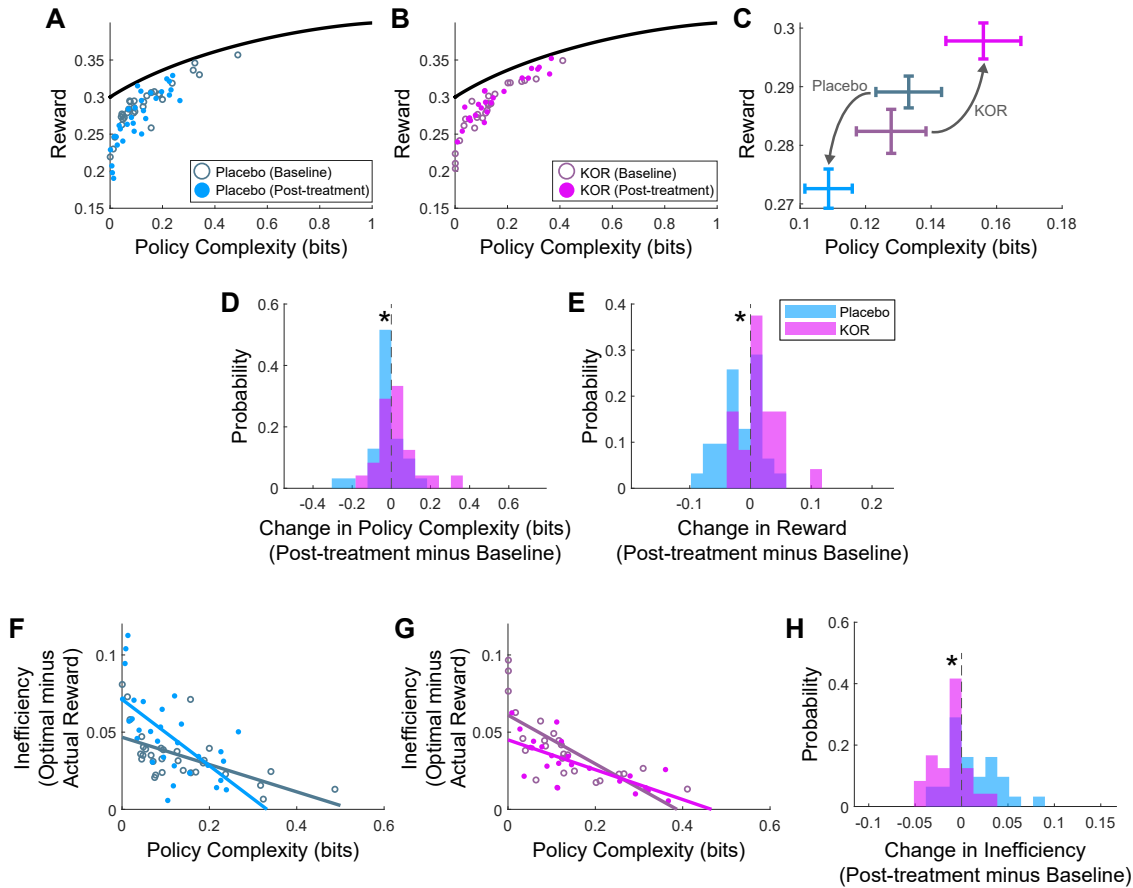

**Figure 2: Changes in policy complexity and efficiency as a function of KOR antagonism.**

A,B) Reward-complexity relationship for the placebo and KOR groups at baseline and post-treatment. The black line shows the reward-complexity frontier, which indicates the optimal reward as a function of policy complexity.

C) Mean  $\pm$  SEM reward-complexity relationship as a function of treatment (placebo or KOR antagonism) and time (baseline or post-treatment).

D) Change in policy complexity (post-treatment minus baseline) as a function of treatment.

E) Change in reward (post-treatment minus baseline) as a function of treatment.

F,G) Relationship between inefficiency and complexity for the placebo and KOR groups. Overlaid lines are from a linear mixed-effects model fitting inefficiency as a function of policy complexity, treatment, and time.

H) Change in inefficiency (post-treatment minus baseline) as a function of treatment.

83  $-0.0165 \pm 5.61 \times 10^{-3}$ ; KOR,  $0.0154 \pm 6.53 \times 10^{-3}$ ,  $p = 4.81 \times 10^{-4}$ ). Following treatment, the  
84 KOR group also became significantly more efficient compared to the placebo group (Figure 2H;  
85 mean change in inefficiency (post-treatment minus baseline)  $\pm$  SEM: placebo,  $0.0130 \pm 4.80 \times 10^{-3}$ ;  
86 KOR,  $-0.0109 \pm 4.04 \times 10^{-3}$ ,  $p = 5.68 \times 10^{-4}$ ). Thus, KOR antagonism increases average reward  
87 through a combination of increasing both policy complexity and efficiency.

88 Policy compression makes the additional prediction that more complex policies should result  
89 in slower response times, since the brain must inspect more bits to find a coded state [16, 18, 30].  
90 Indeed, we found that KOR antagonism, relative to placebo, slowed participants down (mean  
91 change in response times (post-treatment minus baseline)  $\pm$  SEM: placebo,  $-59.3\text{ms} \pm 23.4$ ; KOR,  
92  $13.6\text{ms} \pm 20.4$ ,  $p = 0.0274$ ).

93 To better understand how KOR treatment changed the relationship between inefficiency and  
94 policy complexity, we fit a linear mixed effects model predicting inefficiency as a function of policy  
95 complexity, treatment, and time. We identified two relevant effects: a significant treatment  $\times$   
96 time interaction (coefficient =  $-0.0405$ ,  $p = 4.23 \times 10^{-5}$ ), which has the effect of lowering the  
97 intercept, and a significant policy complexity  $\times$  treatment  $\times$  time interaction (coefficient =  $0.187$ ,  
98  $p = 1.76 \times 10^{-3}$ ), which has the effect of increasing the slope. The combination of the change in  
99 intercept and slope has the net effect of increasing efficiency as a function of policy complexity,  
100 revealing that KOR treatment increases efficiency independent of its changes to complexity. We  
101 will develop this insight further with our reinforcement learning modeling. Overall, these results  
102 suggest two orthogonal effects of KOR treatment: increases in complexity and increases in efficiency.  
103 Stated another way, participants gain increased cognitive resources *and* make better use of those  
104 resources.

## 105 Reinforcement learning model of KOR antagonism

106 We developed a cost-sensitive reinforcement learning model to gain insight into how KOR antag-  
107 onism affects decision making. We adapted a  $Q$ -learning model, ubiquitous in the reinforcement  
108 learning literature [31]. This model estimates the expected reward associated with each action for  
109 each stimulus (called  $Q$ -values) and updates these estimates by learning from the outcome (pres-  
110 ence or absence of reward). Since the optimal policy under policy compression contains a marginal  
111 action probability term to engender perseveration (state-independent actions), we augmented our  
112 model with a marginal action probability term that was similarly estimated on a trial-by-trial ba-  
113 sis. Our model contained a reward learning rate,  $\alpha_{\text{learn}}$ , to govern the learning of action values, a  
114 perseveration learning rate,  $\alpha_{\text{persev}}$ , to govern the learning of the marginal action probability, and a  
115 reward sensitivity parameter,  $\beta$ , that determines the balance between action values and persevera-  
116 tion in driving behavior. The  $\beta$  parameter is linked to capacity, where higher capacity is associated  
117 with higher values of  $\beta$ . Given the structure of our model,  $\beta$  is equivalent to a parameter scaling  
118 reward magnitude, as has been posited in anhedonia [12].

119 To model the effects of treatment, we allowed KOR and placebo to scale these parameters. Based  
120 on formal model comparison (Extended Data Table 1), we selected a model that separately scaled  
121 the perseveration learning rate,  $\alpha_{\text{persev}}$ , and the reward sensitivity,  $\beta$ , as a function of treatment.  
122 We confirmed that our model could recover  $\alpha_{\text{persev}}$  and  $\beta$ , the parameters of interest (Extended  
123 Data Table 2). To provide confidence in the ability of our model to capture key characteristics  
124 of the data, we first fit the model to participant data and then had the model perform the PRT  
125 (using the parameter estimates for each participant) to generate a synthetic dataset (Extended  
126 Data Figure 1). This simulated dataset captured all key features of our data (see Supplementary  
127 information).

128 Having confirmed that our model could generate realistic data and recover parameters of inter-  
129 est, we turned our attention to parameter estimates to better understand how treatment affected  
130 decision making. We found that placebo and KOR antagonism scaled the perseveration learning  
131 rate,  $\alpha_{\text{persev}}$  in opposite directions (Figure 3A; posterior 95% credible interval; placebo,  $-2.96$  to  
132  $-0.82$ ; KOR,  $0.61$  to  $1.96$ ). The difference between KOR antagonism and placebo corresponds to

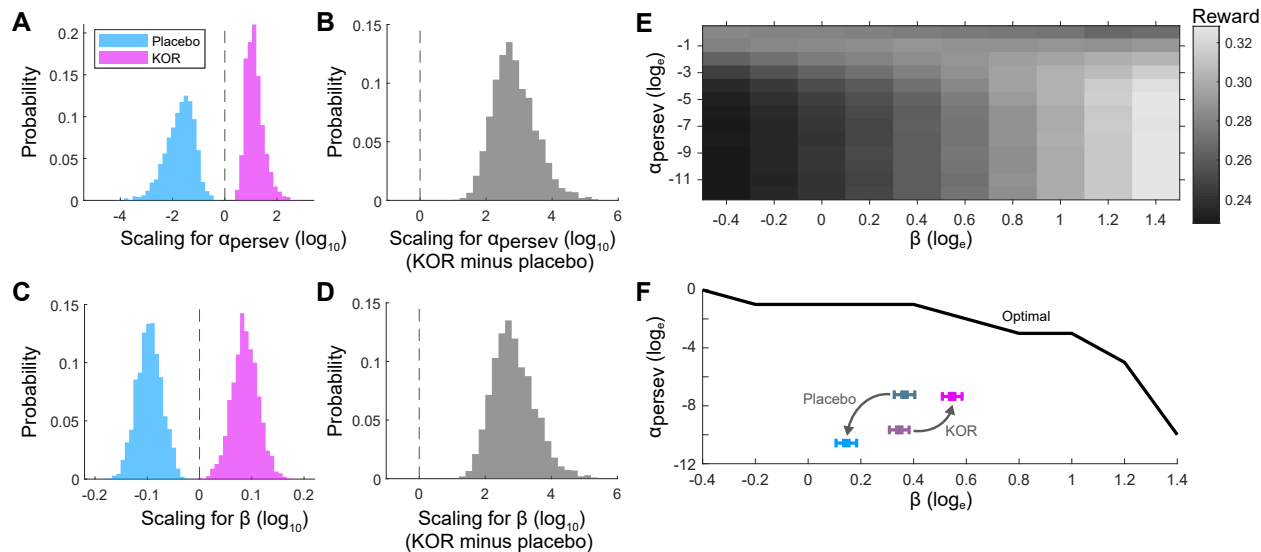

**Figure 3: Scaling of reinforcement learning parameters as a function of KOR antagonism.**

- A) Posterior distribution of parameter values for scaling of  $\alpha_{\text{persev}}$  as a function of treatment. Scaling is multiplicative, where values greater than 0 indicate that treatment increases the parameter value, whereas values less than 0 indicate that treatment decreases the parameter value.
- B) Posterior distribution of treatment effect for scaling  $\alpha_{\text{persev}}$ , estimated as the difference in scaling between KOR and placebo.
- C) Posterior distribution of parameter values for scaling of  $\beta$  as a function of treatment.
- D) Posterior distribution of treatment effect for scaling  $\beta$ .
- E) Heatmap showing mean reward obtained as a function of  $\alpha_{\text{persev}}$  and  $\beta$ .
- F) Effect of treatment in parameter space. Black line shows the optimal  $\alpha_{\text{persev}}$  for each value of  $\beta$ .

133 the net effect of treatment on  $\alpha_{\text{persev}}$ , which was positive and excluded 0, showing that treat-  
 134 ment increases perseveration (Figure 3B; difference in posterior 95% credible interval (KOR minus  
 135 placebo), 1.77 to 4.32). We similarly found that placebo and KOR antagonism scaled the reward  
 136 sensitivity,  $\beta$ , in opposite directions (Figure 3C; posterior 95% credible interval; placebo, -0.143 to  
 137 -0.050; KOR, 0.037 to 0.138), with a treatment effect that was positive and excluded 0 (Figure 3D;  
 138 difference in posterior 95% credible interval (KOR minus placebo), 0.114 to 0.254).

139 To gain insight into how scaling these parameters affects decision making, we simulated datasets  
 140 where we only changed parameters of interest (Extended Data Figure 1; Extended Data Table 3).  
 141 Increasing only  $\alpha_{\text{persev}}$  produces an increase in efficiency and a small decrease in policy complexity.  
 142 The increase in efficiency manifests as a change in the intercept, but not the slope, of the relationship  
 143 between inefficiency and policy complexity. Increasing only  $\beta$  produces a relatively large increase  
 144 in policy complexity, which is consistent with the theoretical link between larger  $\beta$  and increased  
 145 capacity. It also produces an increase in efficiency for low-complexity policies. Increasing both  
 146  $\alpha_{\text{persev}}$  and  $\beta$ , like we find for KOR antagonism, produces both an increase in policy complexity  
 147 and an increase in efficiency. The increase in efficiency manifests as a change in both the intercept  
 148 (decrease) and the slope (increase) of the relationship between inefficiency and policy complexity,  
 149 like our empirical findings.

150 We gained insight into the relationship between KOR antagonism and optimal behavior by  
 151 visualizing the relationship between  $\alpha_{\text{persev}}$ ,  $\beta$ , and reward, while holding  $\alpha_{\text{learn}}$  fixed (Figure 3E).  
 152 As  $\beta$  increases, for the optimal  $\alpha_{\text{persev}}$ , the net reward obtainable also increases, consistent with  
 153 our theory linking higher  $\beta$  to higher capacity and higher capacity to greater reward. We also find  
 154 that increasing perseverative learning is most beneficial at lower values of  $\beta$  (i.e., lower capacity),  
 155 consistent with the idea that perseveration is increasingly optimal as subjects become more resource

156 limited. In Figure 3F, we can see that the effect of KOR antagonism is to shift both  $\alpha_{\text{persev}}$  and  $\beta$   
157 closer to an optimal regime. A notable finding is the increased  $\alpha_{\text{persev}}$  at baseline for the placebo  
158 group relative to the KOR group. This is consistent with the baseline difference in SHAPS between  
159 these groups, with the placebo group having lower SHAPS: the larger  $\alpha_{\text{persev}}$  estimates for this  
160 group is closer to the optimal regime and is consistent with less severe anhedonia.

## 161 Policy complexity and efficiency as a function of hedonic tone

162 Because the original study identified a significant improvement in the SHAPS following KOR an-  
163 tagonism [25], we sought to identify which mechanism—increased policy complexity, increased  
164 efficiency, or both—is associated with anhedonia. We first examined the relationship between he-  
165 donic tone and reward learning in a non-clinical population. We recruited 100 participants from  
166 Amazon Mechanical Turk and implemented a version of the PRT suitable for online delivery [32].  
167 Participants completed the SHAPS and reported a wide range of scores (mean SHAPS  $\pm$  SD: 11.45  
168  $\pm$  6.54, range 0 to 36). We show the reward-complexity relationship in Figure 4A. For visualization  
169 purposes only, we perform a median split of participants on the basis of SHAPS.

170 Unlike the effects of KOR antagonism, we found that SHAPS did not predict policy complexity  
171 (coefficient =  $-5.24 \times 10^{-3}$ ,  $p = 0.241$ ). We did, however, identify a significant relationship  
172 with inefficiency. We fit a linear regression predicting inefficiency as a function of SHAPS and  
173 policy complexity and identified a significant intercept change (coefficient for effect of SHAPS =  
174  $9.55 \times 10^{-3}$ ,  $p = 6.54 \times 10^{-3}$ ) but not a significant slope change (coefficient for SHAPS  $\times$  policy  
175 complexity interaction =  $-0.0182$ ,  $p = 0.394$ ). Given our simulations exploring the effects of  
176 changing parameters (Extended Data Figure 1), a change of intercept without a change of slope is  
177 consistent with hedonic tone affecting perseveration ( $\alpha_{\text{persev}}$ ) and not capacity ( $\beta$ ).

178 We reanalyzed two prior PRT datasets and found similar effects on the relationship between  
179 inefficiency and policy complexity (Extended Data Figure 2). The first was a transdiagnostic  
180 sample of patients (control group:  $N = 25$ ; clinical group:  $N = 41$ , 18 with bipolar disorder, 23  
181 with major depressive disorder) [33, 34]. These groups differed significantly in baseline anhedonia  
182 (mean anhedonic Beck Depression Inventory-II subscore  $\pm$  SD: control,  $0.72 \pm 1.02$ ; clinical,  $5.22$   
183  $\pm 3.78$ ,  $p = 2.22 \times 10^{-7}$ ; mean Mood and Anxiety Symptom Questionnaire-Anhedonic Depression  
184 subscale  $\pm$  SD: control,  $51.5 \pm 12.6$ ; clinical,  $77.1 \pm 19.3$ ,  $p = 1.45 \times 10^{-7}$ ). Consistent with  
185 differences in anhedonia, when we analyzed inefficiency as a function of policy complexity and  
186 group, we identified a significant intercept difference (coefficient for clinical group =  $5.29 \times 10^{-3}$ ,  
187  $p = 0.022$ ) without a concurrent slope difference (coefficient for policy complexity  $\times$  clinical group  
188 interaction =  $-1.71 \times 10^{-3}$ ,  $p = 0.443$ ). We additionally found no difference in policy complexity  
189 between the two groups (mean policy complexity  $\pm$  SEM: control,  $0.371 \pm 0.043$ ; clinical,  $0.333 \pm$   
190  $0.024$ ,  $p = 0.412$ ).

191 The second dataset we analyzed was a test of a longstanding hypothesis relating reduced  
192 dopamine to anhedonia [35, 36]. In this double-blinded study, participants received either placebo  
193 or low-dose pramipexole—thought to reduce phasic dopamine release—and performed the PRT  
194 (placebo group: 13; pramipexole group: 11) [37]. When we analyzed inefficiency as a function of  
195 policy complexity and treatment, we identified a significant intercept effect (coefficient for treat-  
196 ment =  $7.82 \times 10^{-3}$ ,  $p = 0.043$ ) without a significant slope effect (coefficient for policy complexity  
197  $\times$  treatment =  $-1.90 \times 10^{-3}$ ,  $p = 0.615$ ). We also found no difference in policy complexity as  
198 a function of treatment (mean policy complexity: placebo,  $0.297 \pm 0.043$ ; pramipexole,  $0.319 \pm$   
199  $0.057$ ,  $p = 0.757$ ).

## 200 Reinforcement learning model of hedonic tone

201 We next fit a reinforcement learning model similar to the one we used for the KOR dataset, except  
202 now we allowed  $\alpha_{\text{persev}}$  and  $\beta$  to scale as a function of SHAPS. We found that increases in SHAPS  
203 were associated with less perseveration (Figure 4C; posterior 95% credible interval:  $-0.739$  to -

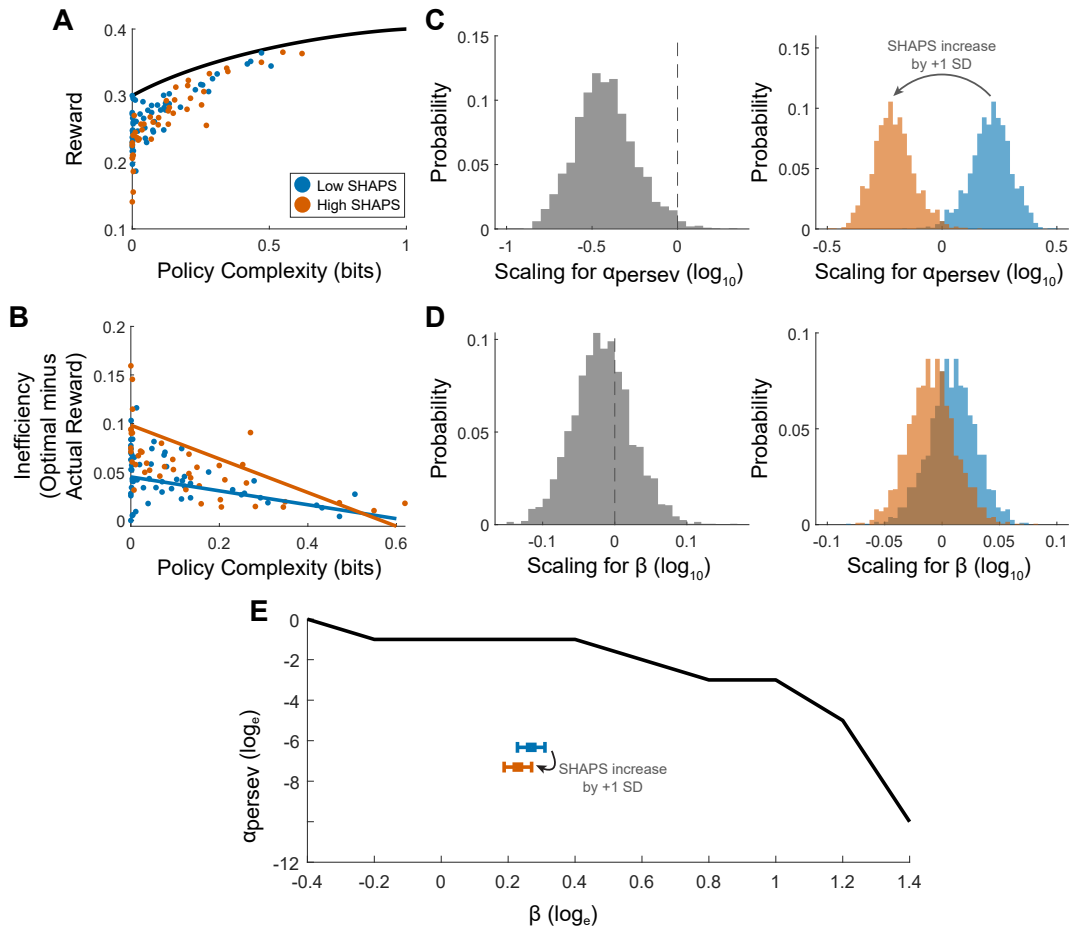

**Figure 4: Changes in complexity, efficiency, and reinforcement learning parameters as a function of hedonic tone.**

A) Reward-complexity tradeoff as a function of hedonic tone. For illustration only, participants are median split on the basis of SHAPS scores into ‘Low SHAPS’ (low anhedonia) and ‘High SHAPS’ (high anhedonia).

B) Inefficiency-complexity relationship as a function of hedonic tone. For illustration only, the color lines are regression fits denoting extremes of SHAPS in our dataset (blue is lowest SHAPS = 0, orange is highest SHAPS = 36).

C) Left: Posterior distribution of parameter values for scaling of  $\alpha_{\text{persev}}$  as a function of SHAPS. Right: An example demonstrating scaling for an increase in SHAPS of 1 SD (from 0.5 SD below the mean (blue) to 0.5 SD above the mean (orange)).

D) Left: Posterior distribution of parameter values for scaling of  $\beta$  as a function of SHAPS. Right: Scaling for the same increase in SHAPS.

E) Effect of variation in SHAPS in parameter space. Black line shows the optimal  $\alpha_{\text{persev}}$  for each value of  $\beta$ .



204 0.046). In contrast, anhedonia had no effect on modulating  $\beta$ , in contrast to KOR antagonism  
205 (Figure 4D; posterior 95% credible interval: -0.097 to 0.066). In parameter space, the net effect  
206 of an increase in SHAPS is to move participants away from an optimal regime (Figure 4E). Taken  
207 together, these data support the notion that hedonic tone spans the axis of efficiency, not capacity.

## 208 Discussion

209 We leveraged a theory of resource-limited reinforcement learning to shed light on the cognitive  
210 structure of anhedonia. Building on prior work demonstrating impairments in reward sensitivity,  
211 we decomposed these impairments into separate effects of policy complexity (state-dependence of  
212 an action policy) and efficiency (utilization of cognitive resources). We found that KOR antagonism  
213 affected both of these measures, whereas anhedonia is associated only with reduced efficiency.

214 The finding that anhedonia is not associated with reduced complexity is surprising, in part, be-  
215 cause complexity determines reward sensitivity, and reward insensitivity appears to be the cardinal  
216 feature of anhedonia (though see [13] for more nuance). There are a number of explanations for this  
217 apparent disconnect. One is that anhedonia may be more psychologically related to the concept  
218 of ‘liking,’ the pleasure associated with reward, rather than ‘wanting,’ the motivation furnished by  
219 reward learning [38], both of which are relevant for anhedonia. In our paradigm, reward sensitivity  
220 is related to ‘wanting,’ which would render the PRT an inappropriate assay to measure deficits  
221 in ‘liking.’ Further, the SHAPS is not designed to disambiguate these different aspects of reward  
222 processing, but newer scales such as the Dimensional Anhedonia Rating Scale [39], the Temporal  
223 Experience of Pleasure Scale [40], and the Positive Valence Systems Scale [41] provide insight into  
224 the multidimensional nature of anhedonia.

225 It is also plausible that anhedonia might be a consequence of reduced reward *learning*, not  
226 reduced reward sensitivity [42]. A limitation of our study is that our model could not recover  
227 the reward learning rate (Extended Data Figure 1). It is worth noting that our findings seem at  
228 odds with an influential reinforcement learning account of anhedonia implicating decreased reward  
229 sensitivity as the key causal variable [12]. Interestingly, the parameterization of that model links  
230 increased reward sensitivity with increased perseveration. Our model orthogonalizes reward sensi-  
231 tivity from perseveration, suggesting what was previously identified as blunted reward sensitivity  
232 may have been impaired perseverative learning (see Supplementary materials).

233 Under our computational framework, perseveration is closely related to habits, since habits can  
234 be similarly thought of as state-independent actions within a particular context [43]. A prediction  
235 of our findings is that anhedonia may not only manifest as a deficit in perseveration, but may  
236 also manifest as a deficit in habit formation. Intriguingly, recent work on the origin of habits has  
237 revealed that they are largely divorced from reward [44]. If true, this would highlight a cognitive  
238 deficit in anhedonia unrelated to reward processing. Altogether, our findings motivate a future  
239 research program studying habit formation in anhedonia, both important for better understanding  
240 this symptom and because it may form the basis of clinically relevant behavioral interventions.

241 The aspect of KOR antagonism which appears to be unrelated to anhedonia (increased policy  
242 complexity) suggests relevant clinical utility outside of anhedonia. As one example, we hypothe-  
243 size KOR antagonism may prove beneficial in treating cognitive deficits in chronic schizophrenia,  
244 a clinically-relevant domain with pressing needs for psychopharmacological treatment. Cognitive  
245 deficits in schizophrenia are well-established [45] and cognitive deficits are among the strongest  
246 predictors of functional outcomes [46]. Despite decades of effort, there are no first-line pharma-  
247 cotherapies for cognitive symptoms in schizophrenia [45] (though recently-developed muscarinic  
248 acetylcholine receptor agonists show promise [47, 48, 49]). We recently demonstrated that patients  
249 with chronic schizophrenia have *reduced* policy complexity relative to healthy control participants  
250 [29]. It stands to reason that increasing complexity in chronic schizophrenia, perhaps via KOR an-  
251 tagonism, might treat a subset of cognitive deficits and improve functional outcomes. Although it  
252 may seem counterproductive to administer dopaminergic drugs in schizophrenia, numerous studies

253 have shown that dopamine-releasing agents can be safe to administer in this population [50, 51, 52].  
254 Neurobiologically, our finding that KOR antagonism increases complexity is similar to our  
255 previous results following administration of dopaminergic medications in Parkinson’s disease [18].  
256 A new subtlety of our findings here is that tonic dopamine may control the efficiency of resource  
257 allocation, a finding that is perhaps related to the role of dopamine in habit formation [53, 54, 55].  
258 Further, anhedonia may be related to more subtle disruptions in the dopaminergic system than  
259 had been previously thought, as more global disruptions would likely reduce complexity as well.

## 260 Conclusion

261 We leveraged computational principles to identify two mechanisms of action of KOR antagonism—  
262 one related to anhedonia (increase in efficiency), and one unrelated to anhedonia (increase in  
263 policy complexity). We hypothesize that the increase in complexity can be leveraged for other  
264 indications, including possibly cognitive deficits in psychosis. Our results provide a clear example  
265 of the potential for computational psychiatry to provide transdiagnostic insights that integrate  
266 across levels of analysis.

## 267 **Methods**

### 268 **KOR antagonism: randomized control trial design and participants**

269 We conducted a secondary analysis of a phase 2a clinical trial designed to test the efficacy of a novel  
270  $\kappa$ -opioid receptor (KOR) antagonist for the treatment of anhedonia [25, 26, 56]. The trial was an 8-  
271 week, multicenter, placebo-controlled, double-blind, randomized study in a transdiagnostic sample  
272 of participants with anhedonia. Active drug was JNJ-67953964 (Aticaprant, previously CERC-  
273 501 and LY2456302), a selective KOR antagonist dosed at 10mg daily. Since this trial used a  
274 biomarker-based proof-of-mechanism approach, the preregistered primary outcome was a change in  
275 functional magnetic resonance imaging of the ventral striatum during reward anticipation, measured  
276 at baseline and 8 weeks. Preregistered secondary outcomes were a change in the mean Snaith-  
277 Hamilton Pleasure Scale (SHAPS), a clinically-validated measure of anhedonia [57], assessed every  
278 2 weeks, and a change in the response bias - a measure of reward learning - on the Probabilistic  
279 Reward Task. The trial was preregistered at [NCT02218736](#). We report here a secondary analysis  
280 of the Probabilistic Reward Task, which was not part of the preregistered protocol.

281 Participants were aged 21 to 65, recruited from six US centers, had a SHAPS of at least 20  
282 (assessed using dimensional scoring guidelines [58]), and had a DSM-IV TR diagnosis of major  
283 depressive disorder, bipolar I or II depression, generalized anxiety disorder, social phobia, panic  
284 disorder, or post-traumatic stress disorder. Participants were enrolled after providing informed  
285 consent to a protocol approved by each local institutional review board. Our dataset for secondary  
286 analysis consisted of 55 patients (KOR antagonist group:  $N = 24$  [44%]; mean age  $\pm$  SD,  $39.2 \pm$   
287  $13.9$  years; 10 males [42%]; placebo group:  $N = 31$  [56%]; mean age  $\pm$  SD,  $40.8 \pm 13.7$  years; 12  
288 males [39%]) [26]).

### 289 **Non-clinical population: study design and participants**

290 We conducted an online-based study to assess how variation in hedonic tone affects reward learning  
291 in a non-clinical population. We recruited 100 participants (mean age  $\pm$  SD,  $41.9 \pm 11.5$ ; 62 males  
292 [62%]) from Amazon Mechanical Turk. We selected our sample size based on an effect size we  
293 assumed would be half of what we identified for the KOR dataset ( $f^2 = 0.1297$ ) with a desired  
294 power of 90% to maximize the probability of identifying an effect. These participants completed the  
295 Probabilistic Reward Task followed by a demographic survey and the SHAPS. Participants gave  
296 informed consent, and the Harvard University Committee on the Use of Human Subjects approved  
297 the experiment.

### 298 **Clinical population: study design and participants**

299 We reanalyzed data from patient populations performing the PRT [33, 34]. The dataset consisted  
300 of 66 total participants (control group:  $N = 25$  [38%]; mean age  $\pm$  SD,  $38.4 \pm 10.8$ ; 14 males  
301 [56%]; clinical group:  $N = 41$  [62%]; mean age  $\pm$  SD,  $41.9 \pm 10.3$ ; 24 males [59%]; 18 with  
302 bipolar disorder [44%], 23 with major depressive disorder [56%]). The control participants had  
303 no psychiatric diagnosis and were taking no psychoactive medications. In addition to the PRT,  
304 participants completed the Beck Depression Inventory-II and the Mood and Anxiety Symptom  
305 Questionnaire.

### 306 **Pramipexole administration: study design and participants**

307 We reanalyzed data from a double-blind, randomized trial assessing the effect of pramipexole, a  
308 D2/D3 receptor agonist, on reward learning in the PRT [37]. Participants (placebo group: 13  
309 [54%]; mean age  $\pm$  SD,  $24.8 \pm 3.2$ ; 8 males [62%]; pramipexole group: 11 [46%]; mean age  $\pm$  SD,  
310  $26.0 \pm 5.8$ ; 6 males [56%]) were randomized to placebo or pramipexole. In the pramipexole group,  
311 participants received a single 0.5mg dose, a low dose thought to act as a dopamine antagonist and

312 reduce phasic dopamine release. Participants completed the PRT 2 hours after receiving placebo  
313 or pramipexole.

### 314 **Snaith-Hamilton Pleasure Scale (SHAPS)**

315 The SHAPS is a 14-item questionnaire used to assess anhedonia across four domains: inter-  
316 est/pastimes, social interaction, sensory experience, and food/drink. Participants are asked to  
317 respond to pleasurable situations (e.g., I would enjoy being with my family or close friends) with  
318 one of the following responses on the basis of the last few days: strongly disagree, disagree, agree,  
319 strongly agree. According to dimensional scoring guidelines [58], scores range from 1 for strongly  
320 agree to 4 for strongly disagree, yielding a range of 14 to 56, with higher scores corresponding to  
321 greater anhedonia. The SHAPS is the only clinical measure of anhedonia that significantly changes  
322 with treatment in clinical trials [25, 59, 60].

### 323 **Probabilistic Reward Task (PRT)**

324 The PRT is a computerized decision making task designed to elicit learning in response to reward  
325 [27, 28]. On each trial, participants observe one of two difficult-to-discriminate stimuli and are asked  
326 to report which stimulus they observed. In the clinical trial, stimuli consisted of cartoon faces with  
327 either a short mouth (11.5 mm) or a long mouth (13 mm) presented for 100 ms and participants  
328 responded by pressing one of two keyboard keys ('z' or '/'). Participants completed 200 trials in  
329 two 100 trial blocks, instead of 300 trials as usual, owing to time constraints imposed by the clinical  
330 trial [25]. In the online-based task, stimuli consisted of images of either 10 squares/7 circles or 7  
331 squares/10 circles (with 8 variations of each) and participants reported whether they observed more  
332 squares or circles with one of two keyboard keys ('A' or 'L') [32]. Participants completed 300 trials  
333 in three 100 trial blocks. Importantly, and unbeknownst to participants, correctly responding to  
334 one stimulus yielded reward on 60% of trials ('rich' stimulus) while correctly responding to the other  
335 stimulus yielded reward on 20% of trials ('poor' stimulus). They were instructed that not all correct  
336 responses would yield a reward. The rich/poor stimuli and responses were counterbalanced across  
337 participants in both studies. For our analyses, we excluded the first 25 trials to allow behavior to  
338 stabilize. Our findings were qualitatively similar if we changed this trial exclusion threshold.

### 339 **Policy compression: a capacity limit applied to decisions**

340 All information processing systems—the human brain included—must contend with resource lim-  
341 itations when making decisions. These constraints take on many forms, including computational  
342 costs [61], metabolic costs [62], interference costs [63], and others [64]. Under policy compression,  
343 we formalize the cognitive cost as the mutual information between states and actions, the policy  
344 *complexity*:

$$345 I^\pi(S; A) = \sum_s P(s) \sum_a \pi(a|s) \log \frac{\pi(a|s)}{P(a)} \quad (1)$$

346 where  $P(a) = \sum_s P(s)\pi(a|s)$  is the marginal probability of choosing action  $a$  under the policy.  
347 In general, we assume that policies are subject to a capacity constraint, an upper bound,  $C$ , on  
348 policy complexity. Shannon's noisy channel theorem states that the minimum expected number of  
349 bits to transmit a signal across a noisy information channel without error is equal to the mutual  
350 information. Therefore, if the optimal policy requires more memory than the subject possesses,  
351 then it must *compress* the policy, or render it less state-dependent. We define the optimal policy,  
 $\pi^*$ , as:

$$352 \pi^* = \underset{\pi}{\operatorname{argmax}} V^\pi, \text{ subject to } I^\pi(S; A) \leq C \quad (2)$$

352 where  $V^\pi$  is the expected reward under policy  $\pi$ :

$$V^\pi = \sum_s P(s) \sum_a \pi(a|s) Q(s, a) \quad (3)$$

353 and  $Q(s, a)$  is the expected reward for taking action  $a$  in state  $s$ .

354 We can express our constrained optimization problem in the following unconstrained Lagrangian  
355 form:

$$\pi^* = \operatorname{argmax}_\pi \beta V^\pi - I^\pi(S; A) - \sum_s \lambda(s) \left( \sum_a \pi(a|s) - 1 \right) \quad (4)$$

356 where  $\beta \geq 0, \lambda(s) \geq 0$  are Lagrangian multipliers. Solving this equation reveals that the optimal  
357 policy takes on the following form:

$$\pi^*(a|s) \propto \exp[\beta Q(s, a) + \log P^*(a)] \quad (5)$$

358 where  $P^*(a)$  is the optimal marginal action distribution, which can be interpreted as a form of  
359 perseveration.

360 The optimal policy takes the form of the familiar softmax distribution, common in the reinforce-  
361 ment learning literature. Here, the Lagrange multiplier,  $\beta$ , plays the role of the inverse temperature  
362 parameter. Note that although  $\beta$  typically takes on the role of balancing exploration/exploitation  
363 in reinforcement learning, we made no such appeals in deriving this policy. Moreover,  $\beta$  is a function  
364 of the policy complexity:

$$\beta^{-1} = \frac{dV^\pi}{dI^\pi(S; A)} \quad (6)$$

365 At high policy complexity, when  $\frac{dV^\pi}{dI^\pi(S; A)}$  is shallow, the optimal  $\beta$  is large and the policy is domi-  
366 nated by  $Q$ -values. At low policy complexity, the optimal  $\beta$  is close to 0, and  $Q$ -values have minimal  
367 impact on the policy. Moreover, when  $\beta$  is small, the perseveration term,  $\log P^*(a)$ , dominates,  
368 and the policy is largely state-independent.

369 To construct the empirical reward–complexity curves, in both datasets, we computed the average  
370 reward according to equation 3, where  $P(s) = [0.5, 0.5]$  and  $Q(s, a) = \begin{bmatrix} 0.2 & 0.6 \\ 0.6 & 0.2 \end{bmatrix}$ , by construction,  
371 and  $\pi(a|s)$  was calculated from empirical action frequencies. We estimated mutual information by  
372 computing the empirical action frequencies for each state for each session.

### 373 Reinforcement learning modeling

We constructed a cost-sensitive  $Q$ -learning model which contains three parameters ( $\alpha_{\text{learn}}, \alpha_{\text{persev}}$ , and  $\beta$ ) and estimates action values,  $Q(s, a)$ , and marginal action probability,  $P(a)$ , to generate actions according to the following policy, mimicking the optimal policy under policy compression:

$$\begin{aligned} \Delta Q(s, a) &= \alpha_{\text{learn}} [r - Q(s, a)] \\ \Delta P(a) &= \alpha_{\text{persev}} [\pi(a|s) - P(a)] \\ \pi(a|s) &\propto \exp[(\beta Q(s, a) + \log(P(a)))] \end{aligned}$$

where  $r = 1$  if the current trial is rewarded and 0 otherwise. The key feature of our model is a mechanism that allows treatment to multiplicatively scale  $\alpha_{\text{persev}}$  and  $\beta$  (obtained after model comparison, see below). The model scales parameters in the following manner:

$$\begin{aligned} \alpha_{\text{persev}} &= \alpha_{\text{persev, baseline}} \cdot 10^{s_{\text{persev, treatment}}} \\ \beta &= \beta_{\text{baseline}} \cdot 10^{s_{\text{beta, treatment}}} \end{aligned}$$

A scaling value of 0 results in no scaling,  $> 0$  results in an increase, and  $< 0$  results in a decrease. For our online study, we scaled parameters as a function of the  $z$ -scored SHAPS in the following

manner:

$$\begin{aligned}\alpha_{\text{persev}} &= \alpha_{\text{persev,baseline}} \cdot 10^{s_{\text{persev}} \cdot \text{SHAPS}} \\ \beta &= \beta_{\text{baseline}} \cdot 10^{s_{\text{beta}} \cdot \text{SHAPS}}\end{aligned}$$

We initialized  $Q(s, a)$  at 0 and  $P(a)$  at 0.5 and we assumed scaling terms equaled 0 on sessions without treatment. We included all trials for analysis. Learning rates were constrained not to exceed 1. We constructed hierarchical models to obtain estimates of each parameter. Parameters were drawn from the following distributions:

$$\begin{aligned}\alpha_{\text{learn}} &\sim \text{Beta}(a_{\text{learn}}, b_{\text{learn}}) \\ \alpha_{\text{persev,baseline}} &\sim \text{Beta}(a_{\text{persev}}, b_{\text{persev}}) \\ \beta_{\text{baseline}} &\sim \text{Gamma}(a_{\text{beta}}, b_{\text{beta}})\end{aligned}$$

where we used  $\text{Cauchy}^+(0,5)$  as a weakly-informative prior for each parameter. The gamma distribution was parameterized with a shape ( $a_{\text{beta}}$ ) and scale ( $b_{\text{beta}}$ ) parameter. Finally, the scaling terms were drawn according to

$$\begin{aligned}s_{\text{persev,treatment}} &\sim N(0, 1) \\ s_{\text{beta,treatment}} &\sim N(0, 1)\end{aligned}$$

374  $\alpha_{\text{learn}}$ ,  $\alpha_{\text{persev,baseline}}$ , and  $\beta_{\text{baseline}}$  were constrained at the group level (one parameter per partici-  
375 pant) and scaling terms were constrained at the treatment level (one parameter per treatment).

376 We initially fit a model that scaled all parameters ( $s_{\text{learn,treatment}}$ ,  $s_{\text{persev,treatment}}$ ,  $s_{\text{beta,treatment}}$ ),  
377 which produced an estimate of  $s_{\text{learn,treatment}}$  that did not differ from 0, suggesting that treatment  
378 did not effect  $\alpha_{\text{learn}}$ . We therefore compared this ‘full’ model to the ‘reduced’ model we present above  
379 (which does not scale  $\alpha_{\text{learn}}$ ). We performed model comparison using Pareto-smoothed importance  
380 sampling leave-one-out cross-validation to estimate the expected log predictive density, a validated  
381 measure of Bayesian model evaluation [65]. We found that our reduced model produced a similar  
382 fit. We next compared our reduced model to three simpler variants: one that only scaled  $\alpha_{\text{persev}}$ ,  
383 one that only scaled  $\beta$ , and one with no scaling of any parameters. Model comparison favored the  
384 model we present above which scales  $\alpha_{\text{persev}}$  and  $\beta$  (Extended Data Table 1).

385 We next performed posterior predictive checks. We used the mean of each parameter as a point  
386 estimate and simulated 200 trials of the PRT for each participant to mimic the dataset that was  
387 used to fit the model. We analyzed this simulated dataset in the exact manner we analyzed the  
388 ground-truth dataset.

389 To provide confidence in our interpretation of parameter changes, we tested the ability of our  
390 model to recover known parameters. Using the same fictive, simulated dataset as above, we fit our  
391 reinforcement learning model and obtained recovered parameter estimates. We computed Pearson’s  
392 correlation between the known and recovered parameters (Extended Data Table 2).

393 For our heatmap of reward obtained with different  $\alpha_{\text{persev}}$  and  $\beta$  combinations, we ran 3,000  
394 independent simulations of the PRT for each combination of parameters. We fixed  $\alpha_{\text{learn}}$  at 0.1423,  
395 the mean posterior estimate across all participants. We performed a grid search across thirteen  
396 logarithmically-spaced  $\alpha_{\text{persev}}$  values from  $e^{-12}$  to  $e^0$ , and ten  $\beta$  values from  $e^{-0.4}$  to  $e^{1.4}$ .

397 Models were fit using R 4.2.2 (accessed with RStudio 2022.12.0+353) using the Rstan package  
398 (version 2.26.13). We performed model comparison using the loo package (version 2.5.1).

## 399 Statistical analyses

400 For all group-level differences, we computed two-sided  $t$ -tests. In the KOR dataset, owing to  
401 repeated measures, we fit linear mixed effects models to predict 1) inefficiency and 2) the probability  
402 of choosing the richer option. Independent variables were policy complexity, treatment (placebo

403 or KOR), and time (baseline or post treatment), with a random intercept per participant. For the  
404 other datasets (online non-clinical, clinical, and pramipexole), we fit a linear regression to predict  
405 inefficiency. For the online non-clinical dataset, the dependent variables were policy complexity  
406 and  $z$ -scored SHAPS. For the clinical dataset, they were policy complexity and group (control or  
407 clinical). For the pramipexole dataset, they were policy complexity and treatment (placebo or  
408 pramipexole). All analyses were 2-sided with an  $\alpha$  of 0.05.

## 409 **Competing interests**

410 A.D.K. has been a consultant for Eisai, Axsome, Big Health, Harmony, Idorsia, Jazz, Janssen,  
411 Takeda, Millenium Merck, Neurocrine, Neurawell, Otsuka, Evecxia and Sage Research and re-  
412 ceived support from the NIH, the Ray and Dagmar Dolby Family Fund, Janssen, Jazz. Neurocrine,  
413 Attune, Harmony, and Axsome. Over the past 3 years, D.A.P. has received consulting fees from  
414 Boehringer Ingelheim, Compass Pathways, Engrail Therapeutics, Karla Therapeutics, Neumora  
415 Therapeutics, Neurocrine Biosciences, Neuroscience Software, Otsuka, Sage Therapeutics, Sama  
416 Therapeutics, Sunovion Therapeutics, and Takeda; he has received honoraria from the Ameri-  
417 can Psychological Association, Psychonomic Society and Springer (for editorial work) as well as  
418 Alkermes; he has received research funding from the Brain and Behavior Research Foundation,  
419 Dana Foundation, Wellcome Leap, Millennium Pharmaceuticals, and NIMH; he has received stock  
420 options from Compass Pathways, Engrail Therapeutics, Neumora Therapeutics, and Neuroscience  
421 Software. D.A.P. has a financial interest in Neumora Therapeutics, which has licensed the copyright  
422 to the PRT through Harvard University. The interests of D.A.P. were reviewed and are managed by  
423 McLean Hospital and Mass General Brigham in accordance with their conflict-of-interest policies.  
424 No funding from these entities was used to support the current work, and all views expressed are  
425 solely those of the authors. B.A.B. and S.J.G. declare no competing interests.

## 426 References

- 427 [1] Gard, D. E., Kring, A. M., Gard, M. G., Horan, W. P. & Green, M. F. Anhedonia in  
428 schizophrenia: distinctions between anticipatory and consummatory pleasure. *Schizophrenia*  
429 *research* **93**, 253–260 (2007).
- 430 [2] Kashdan, T. B., Zvolensky, M. J. & McLeish, A. C. Anxiety sensitivity and affect regulatory  
431 strategies: Individual and interactive risk factors for anxiety-related symptoms. *Journal of*  
432 *Anxiety disorders* **22**, 429–440 (2008).
- 433 [3] Hatzigiakoumis, D. S., Martinotti, G., Giannantonio, M. D. & Janiri, L. Anhedonia and  
434 substance dependence: clinical correlates and treatment options. *Frontiers in psychiatry* **2**, 10  
435 (2011).
- 436 [4] Chevallier, C., Grezes, J., Molesworth, C., Berthoz, S. & Happé, F. Brief report: Selective  
437 social anhedonia in high functioning autism. *Journal of autism and developmental disorders*  
438 **42**, 1504–1509 (2012).
- 439 [5] Meinzer, M. C., Pettit, J. W., Leventhal, A. M. & Hill, R. M. Explaining the covariance  
440 between attention-deficit hyperactivity disorder symptoms and depressive symptoms: The  
441 role of hedonic responsivity. *Journal of clinical psychology* **68**, 1111–1121 (2012).
- 442 [6] Nawijn, L. *et al.* Reward functioning in ptsd: a systematic review exploring the mechanisms  
443 underlying anhedonia. *Neuroscience & Biobehavioral Reviews* **51**, 189–204 (2015).
- 444 [7] Husain, M. & Roiser, J. P. Neuroscience of apathy and anhedonia: a transdiagnostic approach.  
445 *Nature Reviews Neuroscience* **19**, 470–484 (2018).
- 446 [8] Pizzagalli, D. A. *Anhedonia: preclinical, translational, and clinical integration*, vol. 58  
447 (Springer Nature, 2022).
- 448 [9] Guineau, M. G. *et al.* Anhedonia as a transdiagnostic symptom across psychological disorders:  
449 A network approach. *Psychological Medicine* **53**, 3908–3919 (2023).
- 450 [10] Sutton, R. S. & Barto, A. G. *Reinforcement Learning: An Introduction* (MIT Press, 2018).
- 451 [11] Chase, H. *et al.* Approach and avoidance learning in patients with major depression and  
452 healthy controls: relation to anhedonia. *Psychological Medicine* **40**, 433–440 (2010).
- 453 [12] Huys, Q. J., Pizzagalli, D. A., Bogdan, R. & Dayan, P. Mapping anhedonia onto reinforcement  
454 learning: a behavioural meta-analysis. *Biology of mood & anxiety disorders* **3**, 1–16 (2013).
- 455 [13] Huys, Q. J. & Browning, M. A computational view on the nature of reward and value in anhe-  
456 donia. In *Anhedonia: Preclinical, Translational, and Clinical Integration*, 421–441 (Springer,  
457 2021).
- 458 [14] Parush, N., Tishby, N. & Bergman, H. Dopaminergic balance between reward maximization  
459 and policy complexity. *Frontiers in Systems Neuroscience* **5**, 22 (2011).
- 460 [15] Gershman, S. J. Origin of perseveration in the trade-off between reward and complexity.  
461 *Cognition* **204**, 104394 (2020).
- 462 [16] Lai, L. & Gershman, S. J. Policy compression: An information bottleneck in action selection.  
463 In *Psychology of Learning and Motivation*, vol. 74, 195–232 (Elsevier, 2021).
- 464 [17] Mikhael, J. G., Lai, L. & Gershman, S. J. Rational inattention and tonic dopamine. *PLoS*  
465 *computational biology* **17**, e1008659 (2021).



- 466 [18] Bari, B. A. & Gershman, S. J. Undermatching is a consequence of policy compression. *Journal*  
467 *of Neuroscience* **43**, 447–457 (2023).
- 468 [19] Manohar, S. G. *et al.* Reward pays the cost of noise reduction in motor and cognitive control.  
469 *Current Biology* **25**, 1707–1716 (2015).
- 470 [20] Carlezon, W. A. *et al.* Depressive-like effects of the  $\kappa$ -opioid receptor agonist salvinorin a on  
471 behavior and neurochemistry in rats. *Journal of Pharmacology and Experimental Therapeutics*  
472 **316**, 440–447 (2006).
- 473 [21] Bruijnzeel, A. W. kappa-opioid receptor signaling and brain reward function. *Brain research*  
474 *reviews* **62**, 127–146 (2009).
- 475 [22] Ebner, S. R., Roitman, M. F., Potter, D. N., Rachlin, A. B. & Chartoff, E. H. Depressive-like  
476 effects of the kappa opioid receptor agonist salvinorin a are associated with decreased phasic  
477 dopamine release in the nucleus accumbens. *Psychopharmacology* **210**, 241–252 (2010).
- 478 [23] Muschamp, J. W. *et al.* Activation of creb in the nucleus accumbens shell produces anhedonia  
479 and resistance to extinction of fear in rats. *Journal of Neuroscience* **31**, 3095–3103 (2011).
- 480 [24] Wallace, C. W., Holleran, K. M., Slinkard, C. Y., Centanni, S. W. & Jones, S. R. Kappa opioid  
481 receptors negatively regulate real time spontaneous dopamine signals by reducing release and  
482 increasing uptake. *bioRxiv* 2024–02 (2024).
- 483 [25] Krystal, A. D. *et al.* A randomized proof-of-mechanism trial applying the ‘fast-fail’ approach  
484 to evaluating  $\kappa$ -opioid antagonism as a treatment for anhedonia. *Nature medicine* **26**, 760–768  
485 (2020).
- 486 [26] Pizzagalli, D. A. *et al.* Selective kappa-opioid antagonism ameliorates anhedonic behavior:  
487 Evidence from the fast-fail trial in mood and anxiety spectrum disorders (fast-mas). *Neu-*  
488 *ropsychopharmacology* **45**, 1656–1663 (2020).
- 489 [27] Tripp, G. & Alsop, B. Sensitivity to reward frequency in boys with attention deficit hyperac-  
490 tivity disorder. *Journal of clinical child psychology* **28**, 366–375 (1999).
- 491 [28] Pizzagalli, D. A., Jahn, A. L. & O’Shea, J. P. Toward an objective characterization of an  
492 anhedonic phenotype: a signal-detection approach. *Biological psychiatry* **57**, 319–327 (2005).
- 493 [29] Gershman, S. J. & Lai, L. The reward-complexity trade-off in schizophrenia. *Computational*  
494 *Psychiatry* **5** (2021).
- 495 [30] Lai, L. & Gershman, S. J. Human decision making balances reward maximization and policy  
496 compression. *PsyArXiv* (2023).
- 497 [31] Watkins, C. J. & Dayan, P. Q-learning. *Machine learning* **8**, 279–292 (1992).
- 498 [32] de Leeuw, J. R. prt-test-my-brain. <https://github.com/jodeleeuw/prt-test-my-brain>  
499 (2021).
- 500 [33] Pizzagalli, D. A., Iosifescu, D., Hallett, L. A., Ratner, K. G. & Fava, M. Reduced hedonic  
501 capacity in major depressive disorder: evidence from a probabilistic reward task. *Journal of*  
502 *psychiatric research* **43**, 76–87 (2008).
- 503 [34] Pizzagalli, D. A., Goetz, E., Ostacher, M., Iosifescu, D. V. & Perlis, R. H. Euthymic patients  
504 with bipolar disorder show decreased reward learning in a probabilistic reward task. *Biological*  
505 *psychiatry* **64**, 162–168 (2008).

- 506 [35] Wise, R. A. Dopamine and reward: the anhedonia hypothesis 30 years on. *Neurotoxicity*  
507 *research* **14**, 169–183 (2008).
- 508 [36] Argyropoulos, S. V. & Nutt, D. J. Anhedonia revisited: is there a role for dopamine-targeting  
509 drugs for depression? *Journal of psychopharmacology* **27**, 869–877 (2013).
- 510 [37] Pizzagalli, D. A. *et al.* Single dose of a dopamine agonist impairs reinforcement learning  
511 in humans: behavioral evidence from a laboratory-based measure of reward responsiveness.  
512 *Psychopharmacology* **196**, 221–232 (2008).
- 513 [38] Berridge, K. C. & Robinson, T. E. What is the role of dopamine in reward: hedonic impact,  
514 reward learning, or incentive salience? *Brain research reviews* **28**, 309–369 (1998).
- 515 [39] Rizvi, S. J. *et al.* Development and validation of the dimensional anhedonia rating scale (dars)  
516 in a community sample and individuals with major depression. *Psychiatry research* **229**,  
517 109–119 (2015).
- 518 [40] Gard, D. E., Gard, M. G., Kring, A. M. & John, O. P. Anticipatory and consummatory  
519 components of the experience of pleasure: a scale development study. *Journal of research in*  
520 *personality* **40**, 1086–1102 (2006).
- 521 [41] Khazanov, G. K., Ruscio, A. M. & Forbes, C. N. The positive valence systems scale: develop-  
522 ment and validation. *Assessment* **27**, 1045–1069 (2020).
- 523 [42] Pizzagalli, D. A. Toward a better understanding of the mechanisms and pathophysiology  
524 of anhedonia: are we ready for translation? *American Journal of Psychiatry* **179**, 458–469  
525 (2022).
- 526 [43] Robbins, T. & Costa, R. M. Habits. *Current biology* **27**, R1200–R1206 (2017).
- 527 [44] Nebe, S., Kretschmar, A., Brandt, M. C. & Tobler, P. N. Characterizing human habits in the  
528 lab. *Collabra: Psychology* **10** (2024).
- 529 [45] Green, M. F. & Harvey, P. D. Cognition in schizophrenia: Past, present, and future.  
530 *Schizophrenia Research: Cognition* **1**, e1–e9 (2014).
- 531 [46] Green, M. F. Cognitive impairment and functional outcome in schizophrenia and bipolar  
532 disorder. *Journal of Clinical Psychiatry* **67**, 3 (2006).
- 533 [47] Brannan, S. K. *et al.* Muscarinic cholinergic receptor agonist and peripheral antagonist for  
534 schizophrenia. *New England Journal of Medicine* **384**, 717–726 (2021).
- 535 [48] Krystal, J. H. *et al.* Emraclidine, a novel positive allosteric modulator of cholinergic m4  
536 receptors, for the treatment of schizophrenia: a two-part, randomised, double-blind, placebo-  
537 controlled, phase 1b trial. *The Lancet* **400**, 2210–2220 (2022).
- 538 [49] Kaul, I. *et al.* Efficacy and safety of the muscarinic receptor agonist karxt (xanomeline-  
539 trospium) in schizophrenia (emergent-2) in the usa: results from a randomised, double-blind,  
540 placebo-controlled, flexible-dose phase 3 trial. *The Lancet* **403**, 160–170 (2024).
- 541 [50] Tsoi, D. T.-y., Porwal, M. & Webster, A. C. Efficacy and safety of bupropion for smoking  
542 cessation and reduction in schizophrenia: systematic review and meta-analysis. *The British*  
543 *Journal of Psychiatry* **196**, 346–353 (2010).
- 544 [51] Englisch, S., Morgen, K., Meyer-Lindenberg, A. & Zink, M. Risks and benefits of bupropion  
545 treatment in schizophrenia: a systematic review of the current literature. *Clinical neurophar-*  
546 *macology* **36**, 203–215 (2013).

- 547 [52] Lindenmayer, J.-P., Nasrallah, H., Pucci, M., James, S. & Citrome, L. A systematic review of  
548 psychostimulant treatment of negative symptoms of schizophrenia: challenges and therapeutic  
549 opportunities. *Schizophrenia research* **147**, 241–252 (2013).
- 550 [53] Faure, A., Haberland, U., Condé, F. & El Massioui, N. Lesion to the nigrostriatal dopamine  
551 system disrupts stimulus-response habit formation. *Journal of Neuroscience* **25**, 2771–2780  
552 (2005).
- 553 [54] Wickens, J. R., Horvitz, J. C., Costa, R. M. & Killcross, S. Dopaminergic mechanisms in  
554 actions and habits. *Journal of Neuroscience* **27**, 8181–8183 (2007).
- 555 [55] Wang, L. P. *et al.* Nmda receptors in dopaminergic neurons are crucial for habit learning.  
556 *Neuron* **72**, 1055–1066 (2011).
- 557 [56] Fast-Fail Trials in Mood and Anxiety Spectrum Disorders; Kappa Opioid Receptor Phase  
558 2a. Clinicaltrials.gov identifier: Nct02218736. [https://clinicaltrials.gov/study/  
559 NCT02218736](https://clinicaltrials.gov/study/NCT02218736) (Updated: January 8, 2019. Accessed: February 27, 2024.).
- 560 [57] Snaith, R. P. *et al.* A scale for the assessment of hedonic tone the snaith–hamilton pleasure  
561 scale. *The British Journal of Psychiatry* **167**, 99–103 (1995).
- 562 [58] Franken, I. H., Rassin, E. & Muris, P. The assessment of anhedonia in clinical and non-  
563 clinical populations: further validation of the snaith–hamilton pleasure scale (shaps). *Journal  
564 of affective disorders* **99**, 83–89 (2007).
- 565 [59] Martinotti, G. *et al.* Acetyl-l-carnitine in the treatment of anhedonia, melancholic and neg-  
566 ative symptoms in alcohol dependent subjects. *Progress in Neuro-Psychopharmacology and  
567 Biological Psychiatry* **35**, 953–958 (2011).
- 568 [60] Di Giannantonio, M. & Martinotti, G. Anhedonia and major depression: the role of agomela-  
569 tine. *European Neuropsychopharmacology* **22**, S505–S510 (2012).
- 570 [61] Bossaerts, P., Yadav, N. & Murawski, C. Uncertainty and computational complexity. *Philo-  
571 sophical Transactions of the Royal Society B* **374**, 20180138 (2019).
- 572 [62] Gailliot, M. T. & Baumeister, R. F. The physiology of willpower: Linking blood glucose to  
573 self-control. *Personality and social psychology review* **11**, 303–327 (2007).
- 574 [63] Musslick, S. *et al.* Parallel processing capability versus efficiency of representation in neural  
575 networks. *Network* **8** (2016).
- 576 [64] Shenhav, A. *et al.* Toward a rational and mechanistic account of mental effort. *Annual review  
577 of neuroscience* **40**, 99–124 (2017).
- 578 [65] Vehtari, A., Gelman, A. & Gabry, J. Practical bayesian model evaluation using leave-one-out  
579 cross-validation and waic. *Statistics and computing* **27**, 1413–1432 (2017).

580 **Extended data**

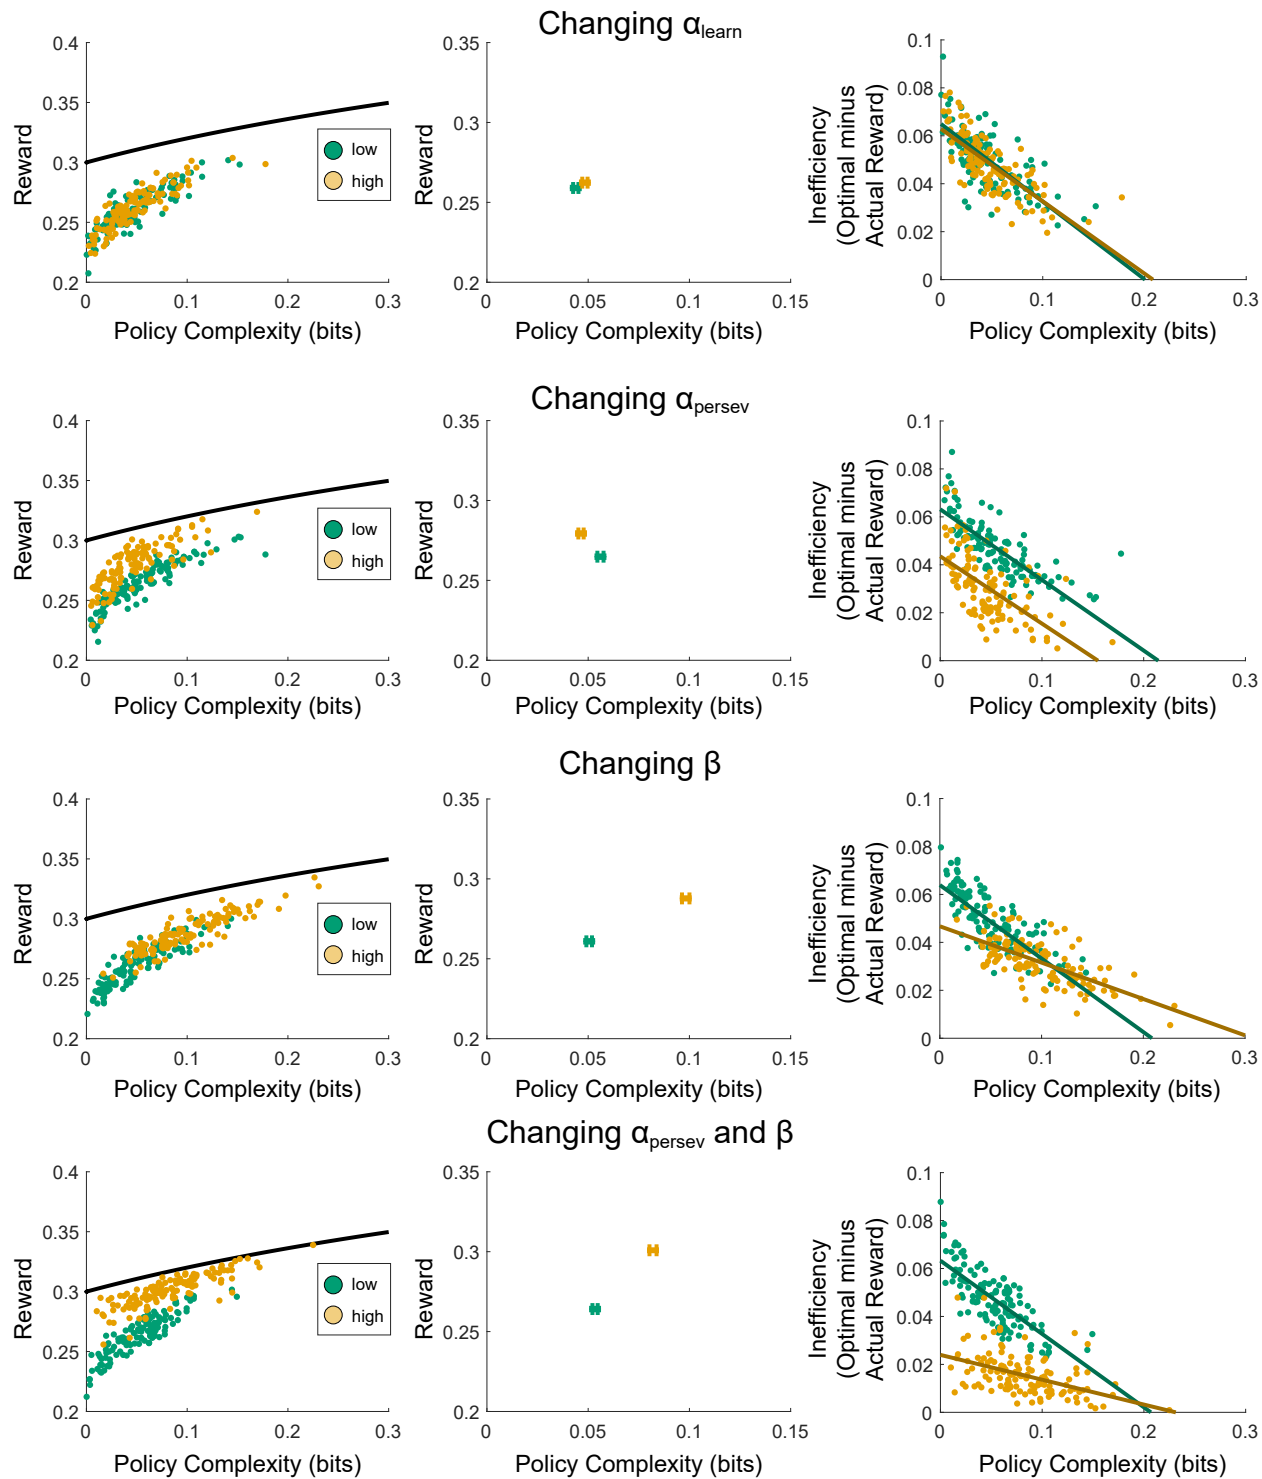

**Extended Data Figure 1: Effect of changing reinforcement learning model parameters on reward-complexity relationship and inefficiency.** Parameter values for simulation are given in Extended Data Table 3.

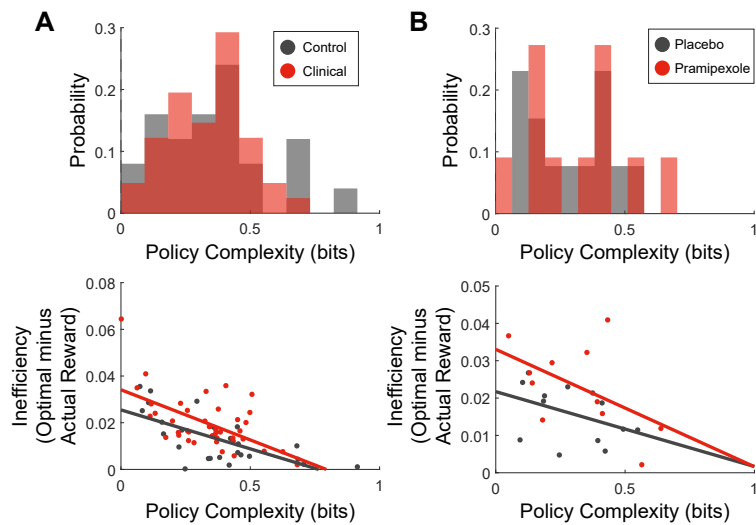

**Extended Data Figure 2: Policy complexity and inefficiency for reanalyzed PRT datasets.**

- A) Clinical dataset from [33] and [34].
- B) Pramipexole dataset from [37].

| Model                         |                                |               | Expected log predictive density difference $\pm$ SE | Effective number of parameters (p_loo) $\pm$ SE |
|-------------------------------|--------------------------------|---------------|-----------------------------------------------------|-------------------------------------------------|
| Scale $\alpha_{\text{learn}}$ | Scale $\alpha_{\text{persev}}$ | Scale $\beta$ |                                                     |                                                 |
|                               | x                              | x             | $0.0 \pm 0.0$                                       | $100.5 \pm 1.2$                                 |
| x                             | x                              | x             | $-1.8 \pm 2.5$                                      | $107.6 \pm 1.3$                                 |
|                               | x                              |               | $-14.7 \pm 6.1$                                     | $112.9 \pm 1.4$                                 |
|                               |                                | x             | $-29.2 \pm 7.8$                                     | $100.8 \pm 1.1$                                 |
|                               |                                |               | $-43.1 \pm 10.1$                                    | $98.5 \pm 1.1$                                  |

**Extended Data Table 1: Model comparison using Pareto-smoothed importance sampling leave-one out cross validation.** A difference in the expected log predictive density of 4 points provides evidence in favor of a model. The first model, which scales  $\alpha_{\text{persev}}$  and  $\beta$ , is favored over the second, which scales all parameters, since it provides similar expected predictive accuracy with fewer parameters.

| Parameter                | Pearson Correlation Between<br>Actual and Recovered Parameter<br>(95% CI) |
|--------------------------|---------------------------------------------------------------------------|
| $\alpha_{\text{learn}}$  | 0.412 (0.183 - 0.607)                                                     |
| $\alpha_{\text{persev}}$ | 0.941 (0.862 - 0.983)                                                     |
| $\beta$                  | 0.926 (0.884 - 0.952)                                                     |

**Extended Data Table 2: Parameter recovery.**

| Simulation                                  | Low Parameter                                                 | High Parameter                                                | Fixed Parameters                                                               |
|---------------------------------------------|---------------------------------------------------------------|---------------------------------------------------------------|--------------------------------------------------------------------------------|
| Changing $\alpha_{\text{learn}}$            | $\alpha_{\text{learn}} = 0.09$                                | $\alpha_{\text{learn}} = 0.18$                                | $\alpha_{\text{persev}} = 2.5 \cdot 10^{-4}$<br>$\beta = 1.4$                  |
| Changing $\alpha_{\text{persev}}$           | $\alpha_{\text{persev}} = 2.5 \cdot 10^{-4}$                  | $\alpha_{\text{persev}} = 2.5 \cdot 10^{-2}$                  | $\alpha_{\text{learn}} = 0.14$<br>$\beta = 1.4$                                |
| Changing $\beta$                            | $\beta = 1.4$                                                 | $\beta = 2.2$                                                 | $\alpha_{\text{learn}} = 0.14$<br>$\alpha_{\text{persev}} = 2.5 \cdot 10^{-4}$ |
| Changing $\alpha_{\text{persev}}$ & $\beta$ | $\alpha_{\text{persev}} = 2.5 \cdot 10^{-4}$<br>$\beta = 1.4$ | $\alpha_{\text{persev}} = 2.5 \cdot 10^{-2}$<br>$\beta = 2.2$ | $\alpha_{\text{learn}} = 0.14$                                                 |

**Extended Data Table 3: Parameters used for Extended Data Figure 1 simulations.**



581 **Supplementary information**

582 **Reinforcement learning model of KOR antagonism: behavioral simulations on**  
 583 **the Probabilistic Reward Task**

584 Treatment increased policy complexity (Supplementary Figure 1D; mean change in policy com-  
 585 plexity (post-treatment minus baseline)  $\pm$  SEM: placebo,  $-0.0214 \pm 7.69 \times 10^{-3}$ ; KOR,  $0.0269 \pm$   
 586  $8.32 \times 10^{-3}$ ,  $p = 9.07 \times 10^{-5}$ ) and reward (Supplementary Figure 1E; mean change in reward (post-  
 587 treatment minus baseline)  $\pm$  SEM: placebo,  $-0.0201 \pm 4.36 \times 10^{-3}$ ; KOR,  $0.0199 \pm 4.62 \times 10^{-3}$ ,  
 588  $p = 7.21 \times 10^{-8}$ ). There was a significant decrease in inefficiency (Supplementary Figure 1H; mean  
 589 change in inefficiency (post-treatment minus baseline)  $\pm$  SEM: placebo,  $0.0161 \pm 3.50 \times 10^{-3}$ ; KOR,  
 590  $-0.0149 \pm 3.53 \times 10^{-3}$ ,  $p = 1.08 \times 10^{-7}$ ). Using the same linear mixed effects model to predict in-  
 591 efficiency as a function of policy complexity, treatment, and time, we found a significant treatment  
 592  $\times$  time interaction (coefficient =  $-0.0346$ ,  $p = 1.94 \times 10^{-7}$ ) and a significant policy complexity  $\times$   
 593 treatment  $\times$  time interaction (coefficient =  $0.290$ ,  $p = 8.66 \times 10^{-4}$ ).

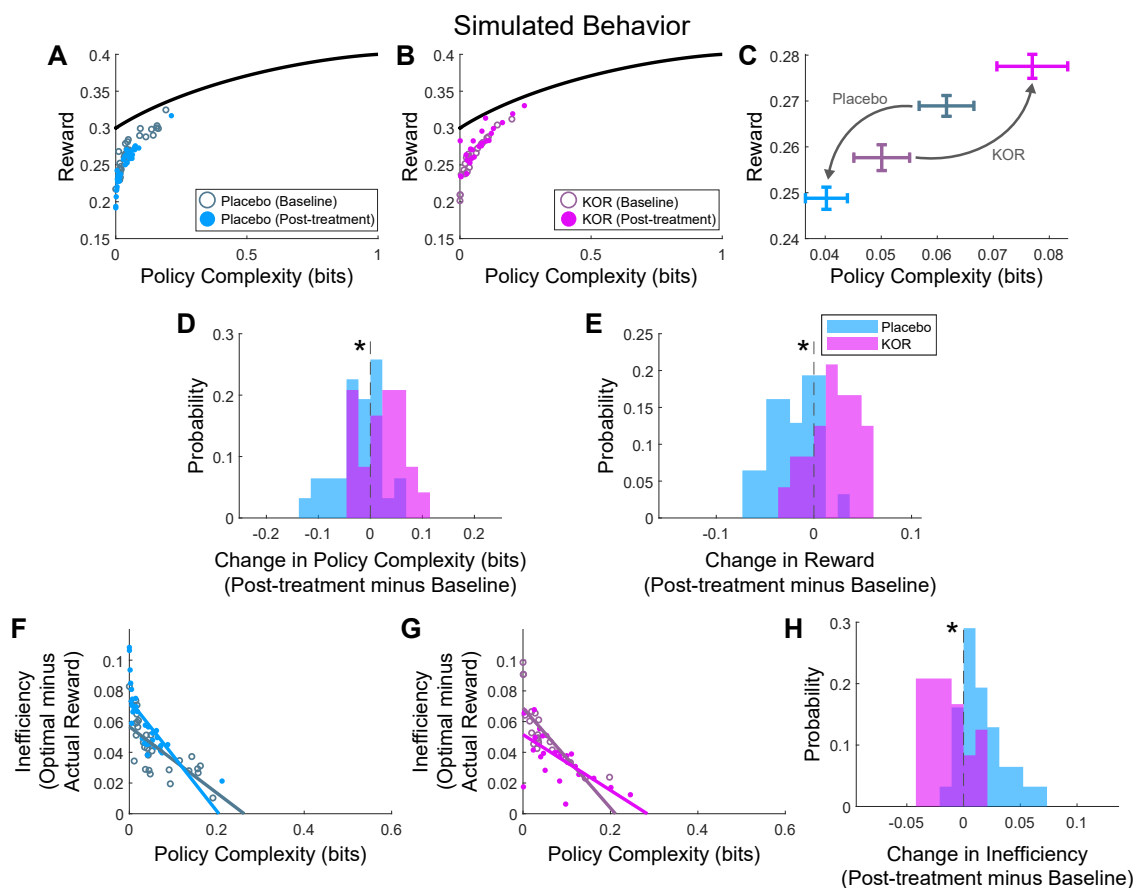

**Supplementary Figure 1: Simulation: changes in complexity and efficiency as a function of KOR antagonism.**

- A,B) Reward-complexity relationship for placebo and KOR groups, at baseline and post-treatment.
- C) Mean  $\pm$  SEM reward-complexity relationship as a function of treatment and time.
- D) Change in policy complexity as a function of treatment.
- E) Change in reward as a function of treatment.
- F-G) Inefficiency-complexity relationship for placebo and KOR groups.
- H) Change in inefficiency as a function of treatment.

## 594 Anhedonia model from Huys et al (2013)

595 Huys et al (2013) developed a reinforcement learning model, fit to PRT data, describing anhedonia as a reduction in reward sensitivity [12]. We will show that the parameterization of reward  
596 nia as a reduction in reward sensitivity [12]. We will show that the parameterization of reward  
597 sensitivity in this model produces a similar effect as our perseveration term.

In their model, reward prediction errors are computed by scaling binary reward,  $r$ , by a reward sensitivity parameter  $\rho$ . These reward prediction errors are multiplied by  $\epsilon$ , the learning rate, to iteratively update  $Q$ -values.

$$\begin{aligned}\delta &= \rho r - Q(s, a) \\ \Delta Q(s, a) &= \epsilon \delta\end{aligned}$$

Given the reward structure in the PRT, this has the effect of scaling  $Q$ -values by  $\rho$  as  $\begin{bmatrix} \rho^{0.2} & 0 \\ 0 & \rho^{0.6} \end{bmatrix}$ . These  $Q$ -values are used to update choice weights, which are fed through a standard softmax decision rule to generate a policy:

$$\begin{aligned}W(s, a) &= \gamma I(s, a) + \zeta Q(s, a) + (1 - \zeta)Q(\bar{s}, a) \\ \pi(a|s) &\propto \exp(W(s, a))\end{aligned}$$

598 The choice weights of this model contain two noteworthy components. The first is an instruction  
599 variable,  $I(s, a)$ , where  $I(s, a) = 1$  for the instructed action for a given stimulus, and 0 otherwise.  
600 Instructions are scaled by  $\gamma$  to capture how strongly instructions influence choice. The second  
601 component describes sensory ambiguity and allows  $Q$ -values for the non-presented stimulus -  $Q(\bar{s}, a)$   
602 - to ‘leak’ into the policy. This is done by the  $\zeta$  parameter, where  $\zeta \in [0.5, 1]$ ;  $\zeta = 1$  describes  
603 no sensory ambiguity (only  $Q(s, a)$  contributes) and  $\zeta = 0.5$  describes complete sensory ambiguity  
604 ( $Q(s, a)$  and  $Q(\bar{s}, a)$  contribute equally).

To see how this sensory ambiguity rule leads to perseveration, we can define  $\zeta = \theta + 0.5$ , where  $\theta \in [0, 0.5]$  and replace  $\zeta$  in the choice weights:

$$W(s, a) = \gamma I(s, a) + (\theta + 0.5)Q(s, a) + (1 - (\theta + 0.5))Q(\bar{s}, a)$$

which we can rearrange as

$$W(s, a) = \gamma I(s, a) + \theta(Q(s, a) - Q(\bar{s}, a)) + 0.5Q(s, a) + 0.5Q(\bar{s}, a)$$

Since the states are equiprobable ( $p(s) = 0.5$ ), this latter set of terms,  $0.5Q(s, a) + 0.5Q(\bar{s}, a)$ , can be written as  $\mathbb{E}_s(Q(s, a)) = \sum_s p(s)Q(s, a)$ , the expected  $Q$ -value of taking action  $a$ . We can therefore write the weights as

$$W(s, a) = \gamma I(s, a) + \theta(Q(s, a) - Q(\bar{s}, a)) + \mathbb{E}_s(Q(s, a))$$

605 Written this way, weights are a function of three variables: 1)  $I(s, a)$ , the instructions, 2)  $Q(s, a) -$   
606  $Q(\bar{s}, a)$ , the difference in  $Q$ -values between the observed and non-observed states, to account for  
607 sensory ambiguity, and 3)  $\mathbb{E}_s(Q(s, a))$ , a state-independent value term which can be thought of as  
608 a kind of perseveration since it will generate an action bias.

609 We ran a simulation to gain an intuition into how  $\mathbb{E}_s(Q(s, a))$  engenders perseveration (Sup-  
610 plementary Figure 2). In this simulation,  $Q(s, a) = \begin{bmatrix} \rho^{0.2} & 0 \\ 0 & \rho^{0.6} \end{bmatrix}$ , meaning  $\mathbb{E}_s(Q(s, a)) \propto \rho^{0.6}$  for the  
611 richer option and  $\propto \rho^{0.2}$  for the leaner option. Intuitively,  $\mathbb{E}_s(Q(s, a))$  will proportionally favor the  
612 richer option as reward sensitivity grows, leading to an action bias.

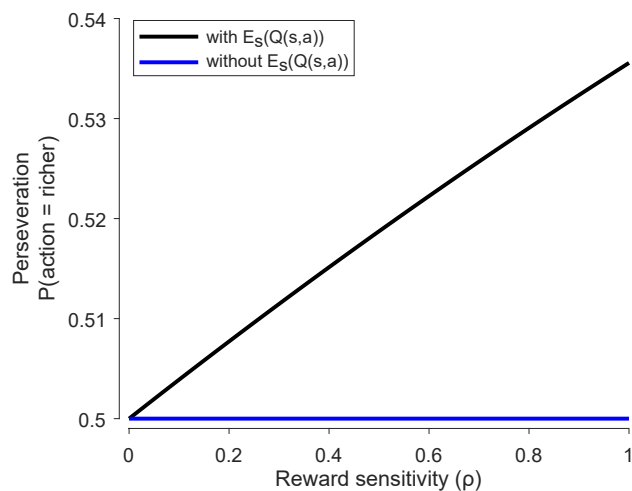

**Supplementary Figure 2: Increasing reward sensitivity ( $\rho$ ) in the Huys et al (2013) model leads to perseveration.**

Increasing reward sensitivity ( $\rho$ ) leads to increased perseveration (black). To demonstrate that the  $E_s(Q(s,a))$  term is responsible for perseveration, we ran the same simulation with the  $E_s(Q(s,a))$  removed (blue). For this simulation, we used  $\gamma = 1$  and  $\epsilon = 0.25$ . Findings were insensitive to choice of  $\gamma$  and  $\epsilon$ .
